# Supplementary material for: Electronic structure regulation of an ultra-thin MOF-derived NiSe2/NiS2@NC heterojunction for promoting the hydrogen evolution reaction
Source: Royal Society of Chemistry journal article supplement (doi:10.1039/d1ma01168e), 2021-12-31
Supplement: d1ma01168e1.pdf [file d1ma01168e1.pdf]

## Supporting Information

### Electronic Structure Regulation on the Ultra-thin MOF-derived NiSe<sub>2</sub>/NiS<sub>2</sub>@NC Heterojunction for Promoting the Hydrogen Evolution Reaction

Kebin Lu<sup>[a,†]</sup>, Jianpeng Sun<sup>[a,†]</sup>, Huakai Xu<sup>[a]</sup>, Chuanhai Jiang<sup>[a]</sup>, Weifeng Jiang<sup>[a]</sup>, Fangna Dai<sup>\* [a]</sup>, Hong Wang<sup>\* [b]</sup>, Hongguo Hao<sup>\* [c]</sup>

<sup>a</sup>College of Science, School of Materials Science and Engineering China University of Petroleum (East China) Qingdao, Shandong, 266580, P. R. China. E-mail: fndai@upc.edu.cn.

<sup>b</sup>College of Materials Science and Engineering, Beijing University of Chemical Technology, Beijing, P. R. China. Beijing University of Chemical Technology Beijing, P. R. China. E-mail: wanghong@mail.buct.edu.cn.

<sup>c</sup>Shandong Provincial Key Laboratory of Chemical Energy Storage and Novel Cell Technology, School of Chemistry and Chemical Engineering, Liaocheng University, Liaocheng 252059, China. E-mail: hhg207@126.com

<sup>†</sup>These authors contributed equally.

### Table of contents

|                                                                  |    |
|------------------------------------------------------------------|----|
| S1 Electrochemical measurements .....                            | 1  |
| Preparation of working electrodes .....                          | 2  |
| Electrochemical measurements .....                               | 2  |
| S2 Density functional theory (DFT) calculations .....            | 2  |
| S3 Material characterization .....                               | 3  |
| S4 The catalytic performance of the material .....               | 8  |
| S5 Density functional theory (DFT) calculations model .....      | 10 |
| S6 Comparison of electrocatalytic performance of materials ..... | 12 |
| References.....                                                  | 13 |

## S1 Electrochemical measurements

### Preparation of working electrodes

The working electrode was prepared in the following way: 5.0 mg of sample was dissolved in the mixture of Nafion solution (50  $\mu\text{L}$ , 5 wt%) and ethanol (950  $\mu\text{L}$ ). The mixture was sonicated for 30 min to form a homogeneous ink. Subsequently, 5  $\mu\text{L}$  of solution was dripped on the glassy carbon electrode at room temperature. The loading amount of the catalyst was  $0.17 \text{ mg}\cdot\text{cm}^{-2}$ . Before taking measurements, the GCE loaded with active materials was allowed to dry at room temperature for one hour.

### Electrochemical measurements

All HER tests in this article were performed with a typical three-electrode system (Gamry INTERFACE 1000 T) at room temperature. The synthetic samples, a graphite rod and a calomel electrode (SCE) were separately used as the working electrode, the counter electrode and the reference electrode. The test solution was 0.5 M  $\text{H}_2\text{SO}_4$  and 1.0 M KOH solution. All test results were corrected by the formula ( $\text{ERHE} = \text{ESCE} + 0.0592\text{pH} + 0.242 \text{ V}$ ) and corrected for the  $iR$ -drop. Before the HER test, the working electrode was scanned with cyclic voltammetry (CV) until the sample is stable. Linear sweep voltammetry (LSV) were recorded at  $5 \text{ mV}\cdot\text{s}^{-1}$ . Electrochemical impedance spectroscopy (EIS) measurements were performed in the frequency range of  $10^{-5} \text{ Hz}$  to  $10^{-2} \text{ Hz}$  with amplitude of 5 mV. To obtain the  $C_{dl}$  value, CV curves were collected at 0.35 to 0.45 V (vs. RHE) with the scan rates of 20 to  $100 \text{ mV}\cdot\text{s}^{-1}$ , respectively. The electrochemical double layer capacitance ( $C_{dl}$ ) values by using the linear slopes of curves of  $\Delta J/2$  vs. scan rate for calculation. The ECSA and the normalized current density were calculated using the double layer capacitance ( $C_{dl}$ ), according to the equation  $\text{ECSA} = C_{dl}/C_s$ ,  $j_{\text{normalized}} = j/\text{ECSA}$ , where  $C_s$  is the specific capacitance of the material,  $j$  is current density. Tafel plots are calculated to understand the reaction mechanism of HER performance according to the Tafel equation  $\eta = b \lg j + a$  ( $j$  stands for current density and  $b$  for slope). The stability was evaluated by using CV at  $100 \text{ mV}\cdot\text{s}^{-1}$  for 2000 cycles. The long-term stability test was completed using chronopotentiometric measurement without  $iR$  drop compensation.

## S2 Density functional theory (DFT) calculations

Density functional theory (DFT) calculations were performed using Vienna ab initio Simulation Package (VASP) with the generalized gradient approximation (GGA) parameterized by Perdew, Burke and Ernzerhof (PBE) for the exchange correlation functional<sup>[1-3]</sup>. An energy cutoff of 300 eV is used for all calculations. We use a 2×2×1 k-point mesh for NiS<sub>2</sub> and NiSe<sub>2</sub>, and a 2×1×1 k-point mesh for NiS<sub>2</sub>/NiSe<sub>2</sub>.

The 128-atom-sized supercell of Ni<sub>24</sub>S<sub>40</sub>/Ni<sub>24</sub>Se<sub>40</sub> interface model was chosen with 5-layer cross-section thick of NiS<sub>2</sub> and NiSe<sub>2</sub> part respectively. Supercells are composed of 8-atomiclayer-thick slabs separated by ~15 Å of vacuum perpendicular to the surface to prevent spurious interactions due to periodic boundary conditions, and we only allow the top two layers to be relaxed. Structures are relaxed until forces on each atom are less than 10<sup>-4</sup> eV/Å.

The adsorption energy of H atom on the catalyst surface was calculated, which is expressed as:

$$\Delta G_{H^*} = \Delta E_H + \Delta E_{ZPE} - T\Delta S$$

Where  $\Delta E_H$ ,  $\Delta E_{ZPE}$ , and  $\Delta S$  are the adsorption energy of hydrogen atom, zero-point energy change and entropy difference of H\* for the two states. We have chosen 0.24 eV as the value of ( $\Delta E_{ZPE} - T\Delta S$ ), and  $\Delta G_{H^*} = \Delta E_H + 0.24$  eV.

### S3 Material characterization

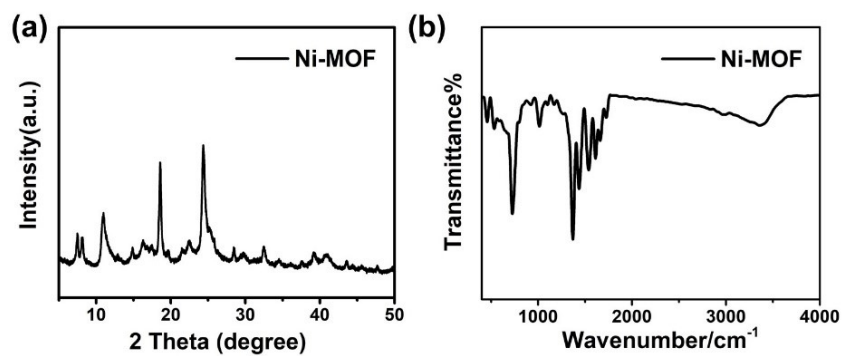

**Figure S1** (a) XRD pattern and (b) FT-IR spectra of ultrathin layered MOF.

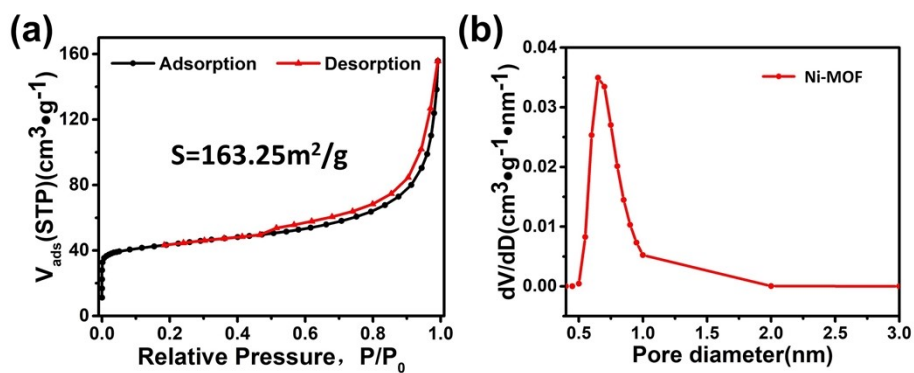

**Figure S2.** (a) N<sub>2</sub> adsorption-desorption isotherms and (b) pore size distribution curve of ultrathin layered MOF.

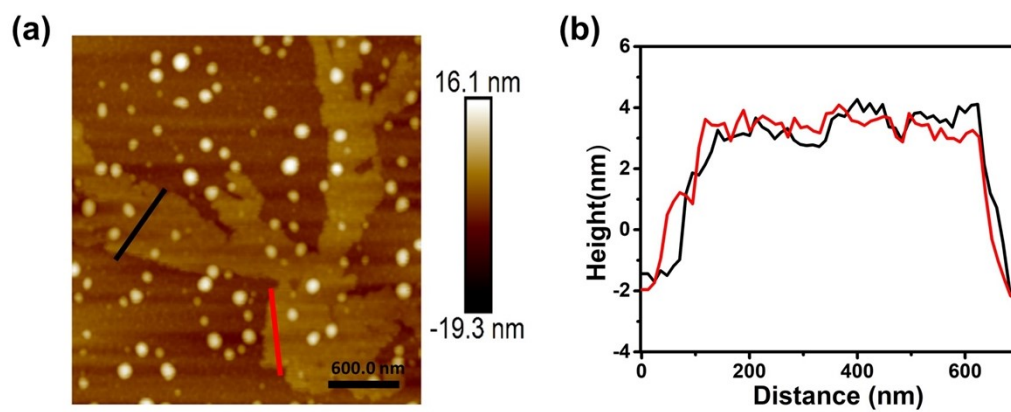

**Figure S3.** AFM images of ultrathin MOF nanosheets

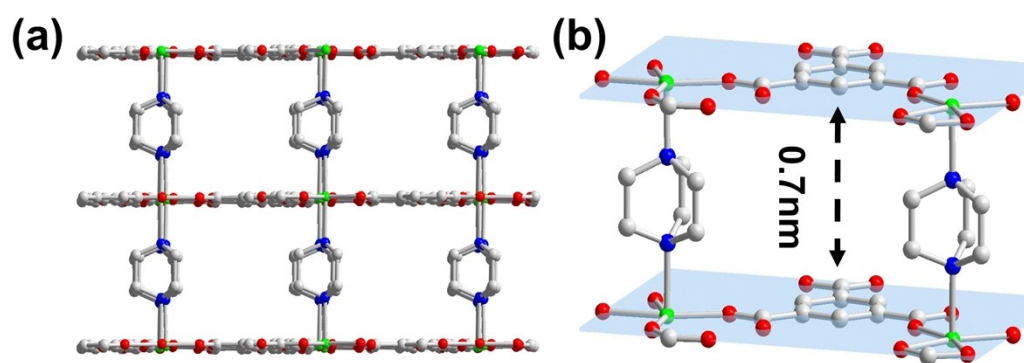

**Figure S4** The pillar-layered structure of ultrathin layered MOF.

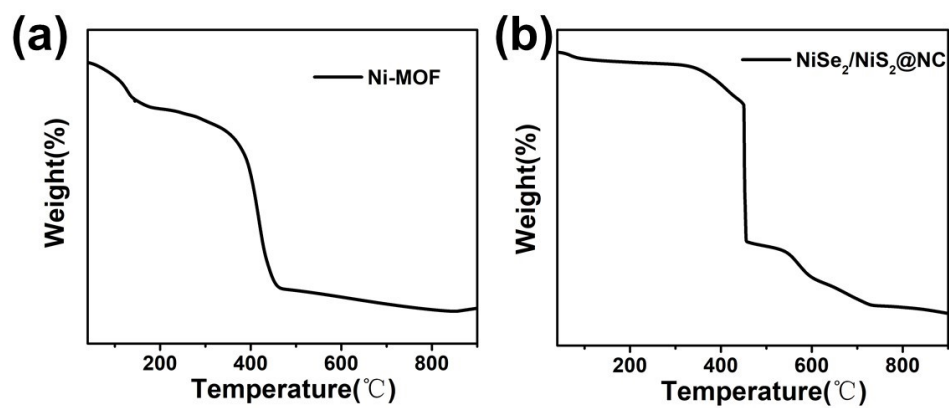

**Figure S5** (a) TGA curve of Ni-MOF performed in the  $N_2$  atmosphere. (b) TGA curve of  $NiSe_2/NiS_2@NC$  nanomaterials performed in the  $O_2$  atmosphere.

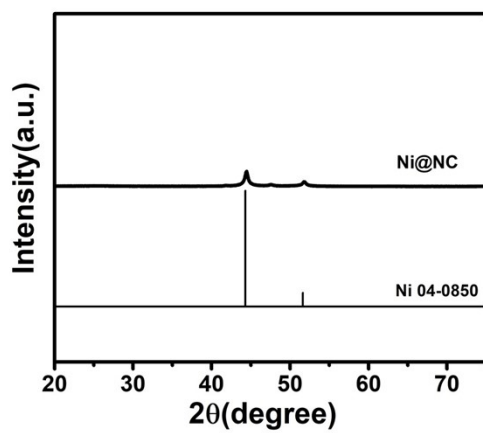

**Figure S6** XRD pattern of Ni@NC

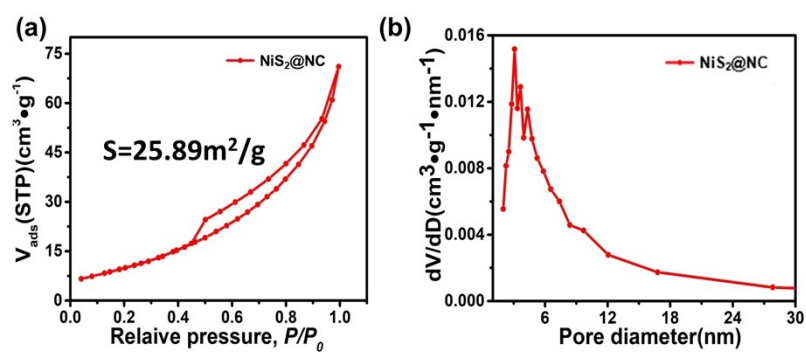

**Figure S7** (a)  $N_2$  adsorption–desorption isotherms and (b) pore size distribution curve of  $NiS_2@NC$ .

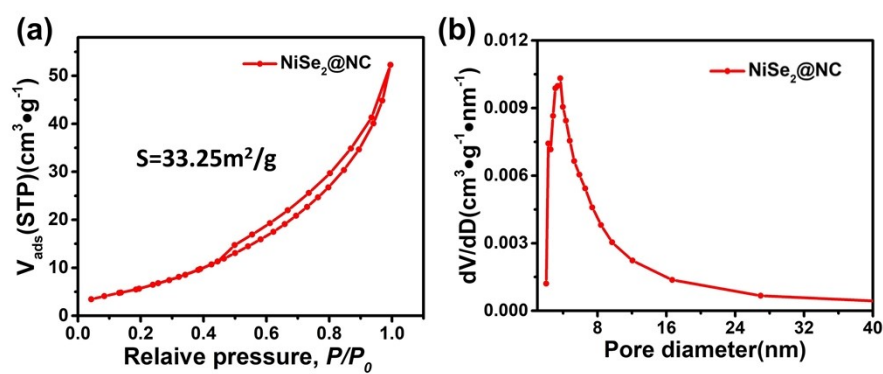

**Figure S8** (a)  $N_2$  adsorption–desorption isotherms and (b) pore size distribution curve of  $NiSe_2@NC$ .

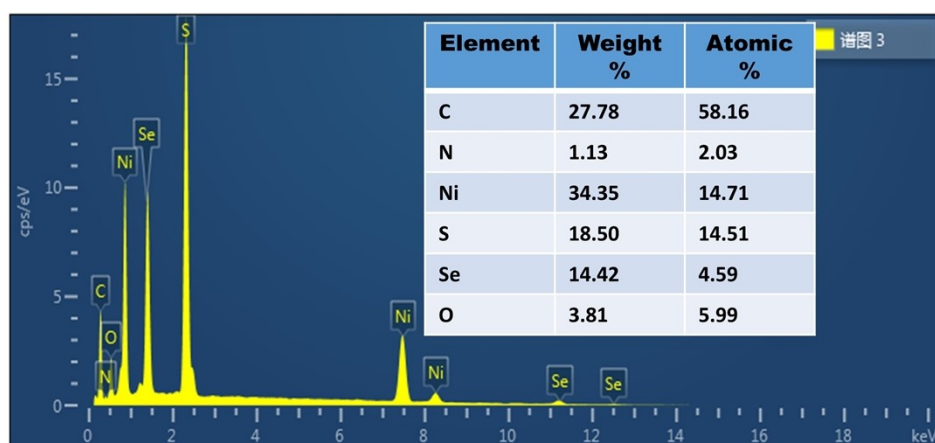

**Figure S9.** Energy dispersive spectra of NiSe<sub>2</sub>/NiS<sub>2</sub>@NC nanomaterials.

#### S4 The catalytic performance of the material

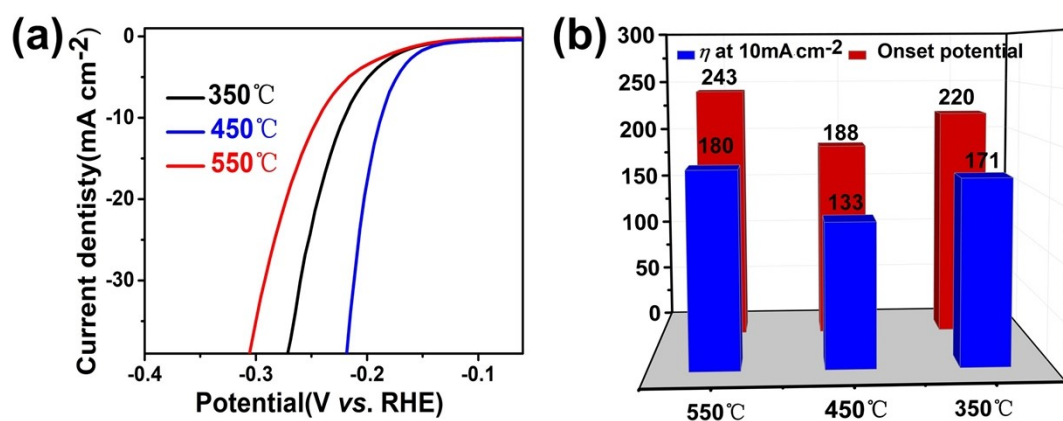

**Figure S10** Electrochemical performance in 0.5 M H<sub>2</sub>SO<sub>4</sub> solution. (a) LSV curves of 350°C, 450°C and 550°C. (b) The onset potential and overpotential ( $\eta$ ) of the as-prepared electrodes at the current density of 10 mA·cm<sup>-2</sup>.

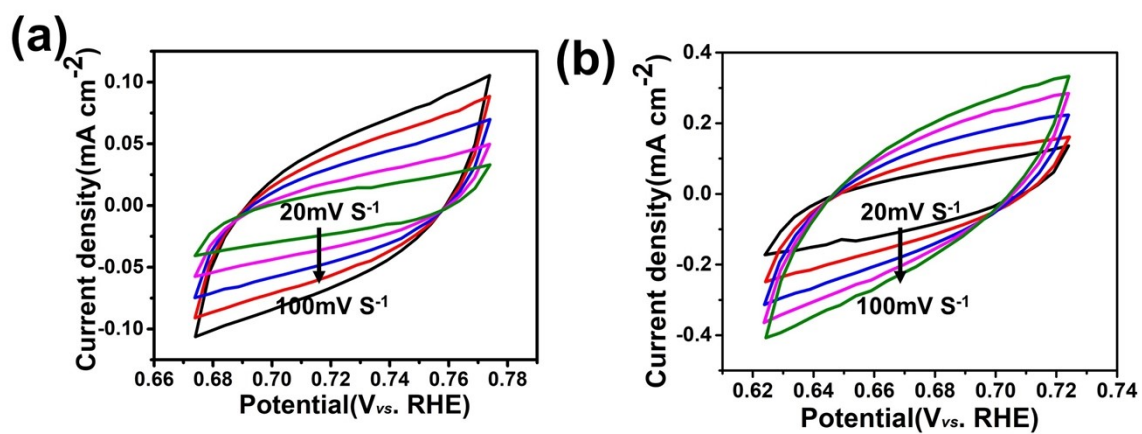

**Figure S11.** Electrochemical performance in 0.5 M H<sub>2</sub>SO<sub>4</sub> solution. (a) The CV curves of NiS<sub>2</sub>@NC. (b) The CV curves of NiSe<sub>2</sub>@NC.

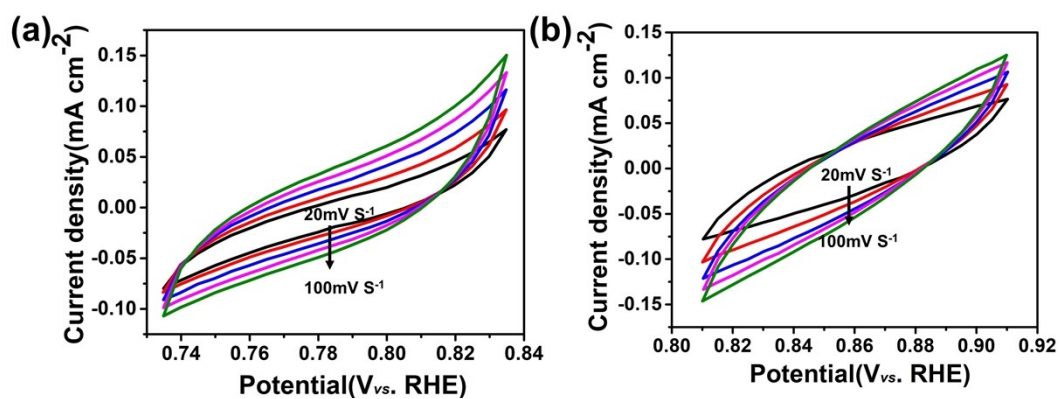

**Figure S12** Electrochemical performance in 1.0 M KOH solution. (a) The CV curves of NiS<sub>2</sub>@NC. (b) The CV curves of NiSe<sub>2</sub>@NC.

S5 Density functional theory (DFT) calculations model

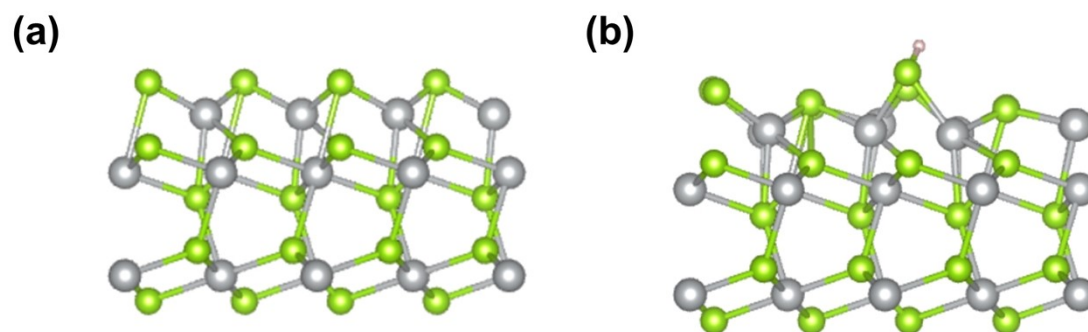

**Figure S13** The theoretical models of (a) NiSe<sub>2</sub> and (b) schematic models of NiSe<sub>2</sub> with H<sup>+</sup> adsorbed on its surface

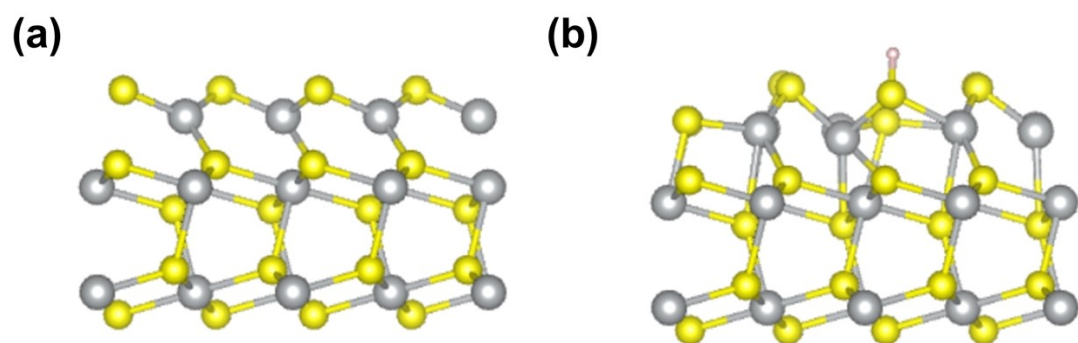

**Figure S14** The theoretical models of (a) NiS<sub>2</sub> and (b) schematic models of NiS<sub>2</sub> with H<sup>+</sup> adsorbed on its surface

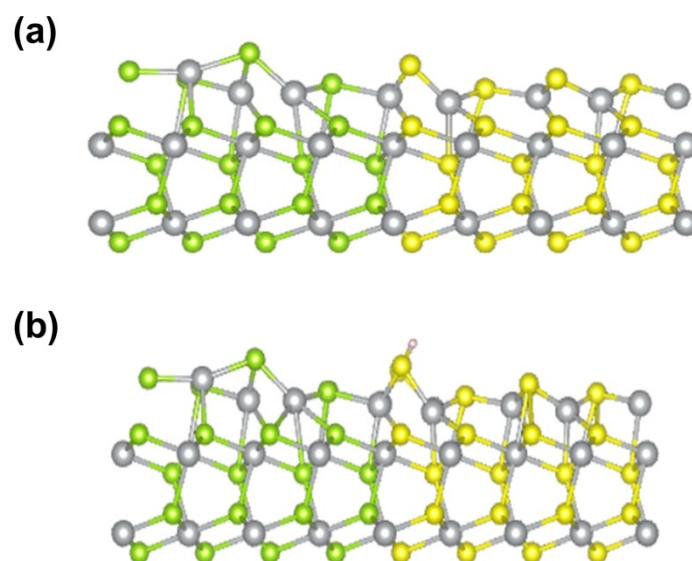

**Figure S15** The theoretical models of (a) NiSe<sub>2</sub>/NiS<sub>2</sub> and (b) schematic models of NiSe<sub>2</sub>/NiS<sub>2</sub> with H<sup>+</sup> adsorbed on its surface

|                                        | $\Delta E$ | $\Delta G$ |
|----------------------------------------|------------|------------|
| NiS <sub>2</sub>                       | -303.206   | -1.114     |
| NiS <sub>2</sub> -H                    | -307.796   |            |
| NiSe <sub>2</sub>                      | -277.729   | -0.519     |
| NiSe <sub>2</sub> -H                   | -281.723   |            |
| NiSe <sub>2</sub> /NiS <sub>2</sub>    | -576.629   | -0.352     |
| NiSe <sub>2</sub> /NiS <sub>2</sub> -H | -580.456   |            |

**Figure S16** The free energy change of the HER process on NiS<sub>2</sub>, NiSe<sub>2</sub>, NiSe<sub>2</sub>/NiS<sub>2</sub>.

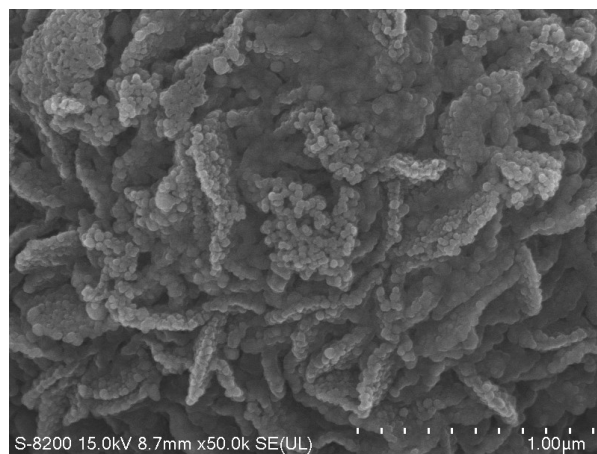

**Figure S17.** Scanning electron microscope image of  $\text{NiSe}_2/\text{NiS}_2@\text{NC}$

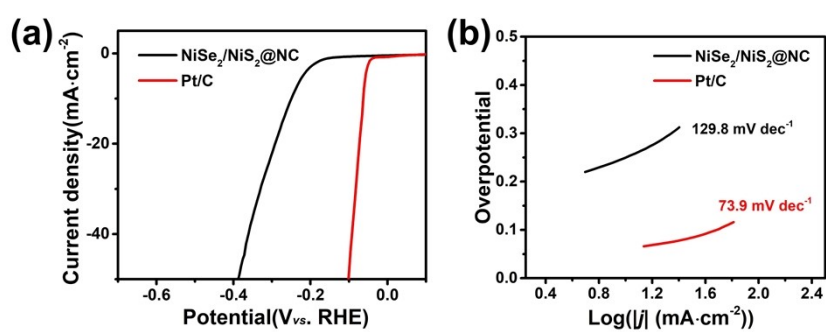

**Figure S18.** The LSV polarization curves and corresponding Tafel plots of  $\text{NiSe}_2/\text{NiS}_2@\text{NC}$  and Pt/C in 1.0 M PBS solution.

## S6 Comparison of electrocatalytic performance of materials

**Table S1.** Comparison of HER catalytic activity of different catalysts in 0.5 M H<sub>2</sub>SO<sub>4</sub>

| HER catalysts                           | E <sub>10</sub> (mV) | Tafel slope (mV·dec <sup>-1</sup> ) | Electrolyte                          | Ref.      |
|-----------------------------------------|----------------------|-------------------------------------|--------------------------------------|-----------|
| NiSe <sub>2</sub> /NiS <sub>2</sub> @NC | 188                  | 46                                  | 0.5 M H <sub>2</sub> SO <sub>4</sub> | This work |
| NiS <sub>2</sub> /MoS <sub>2</sub> HNW  | 235                  | 58                                  | 0.5 M H <sub>2</sub> SO <sub>4</sub> | [4]       |
| MoS <sub>2</sub> /MoO <sub>2</sub>      | 210                  | 129                                 | 0.5 M H <sub>2</sub> SO <sub>4</sub> | [5]       |
| NiS <sub>2</sub> -MoS <sub>2</sub>      | 210                  | 56                                  | 0.5 M H <sub>2</sub> SO <sub>4</sub> | [6]       |
| MoS <sub>2</sub> /MoO <sub>2</sub>      | 240                  | 76                                  | 0.5 M H <sub>2</sub> SO <sub>4</sub> | [7]       |
| Ni@NC/MoS <sub>2</sub> -P               | 315                  | 118.2                               | 0.5 M H <sub>2</sub> SO <sub>4</sub> | [8]       |
| CoS <sub>1.097</sub> /MoS <sub>2</sub>  | 249                  | 75                                  | 0.5 M H <sub>2</sub> SO <sub>4</sub> | [9]       |
| NiSe <sub>2</sub> @NG-140               | 201                  | 36.1                                | 0.5 M H <sub>2</sub> SO <sub>4</sub> | [10]      |
| Ni <sub>0.85</sub> Se/GS                | 200                  | 81                                  | 0.5 M H <sub>2</sub> SO <sub>4</sub> | [11]      |
| NiSe <sub>2</sub> /C                    | 205                  | 38.7                                | 0.5 M H <sub>2</sub> SO <sub>4</sub> | [12]      |
| MoS <sub>2</sub>                        | 210                  | 97                                  | 0.5 M H <sub>2</sub> SO <sub>4</sub> | [13]      |

**Table S2** Comparison of HER catalytic activity of different catalysts in 1 M KOH

| HER catalysts                           | E <sub>10</sub> (mV) | Tafel slope (mV·dec <sup>-1</sup> ) | Electrolyte | Ref.      |
|-----------------------------------------|----------------------|-------------------------------------|-------------|-----------|
| NiSe <sub>2</sub> /NiS <sub>2</sub> @NC | 211                  | 93.2                                | 1.0 M KOH   | This work |
| 0.2CoSe <sub>2</sub> /MoSe <sub>2</sub> | 218                  | 76                                  | 1.0 M KOH   | [14]      |
| CoS <sub>1.097</sub> /MoS <sub>2</sub>  | 249                  | 75                                  | 1.0 M KOH   | [9]       |
| WS <sub>2</sub> -graphene               | 255                  | 100                                 | 1.0 M KOH   | [15]      |
| 2H-MoS <sub>2</sub> /CC                 | 226                  | 62                                  | 1.0 M KOH   | [16]      |
| MoS <sub>2</sub> /C HCSs                | 476                  | 274                                 | 1.0 M KOH   | [17]      |
| Co <sub>0.85</sub> Se@NC                | 230                  | 125                                 | 1.0 M KOH   | [18]      |
| Co@NCNTs-800                            | 240                  | 83                                  | 1.0 M KOH   | [19]      |

|                                     |     |     |           |      |
|-------------------------------------|-----|-----|-----------|------|
| Co <sub>3</sub> O <sub>4</sub> -CuO | 288 | 65  | 1.0 M KOH | [20] |
| NiS <sub>2</sub> HMSs               | 232 | 102 | 1.0 M KOH | [21] |

## References

- [1] G. Kresse and J. Furthmuller, *Phys. Rev. B.*, 1996, **54**, 11169-11186.
- [2] G. Kresse and J. Furthmuller, *Comp. Mater. Sci.*, 1996, **6**, 15-50.
- [3] J. Perdew, K. Burke and M. Ernzerhof, *Phys. Rev. Lett.*, 1996, **77**, 3865-3868.
- [4] P. Y. Kuang, T. Tong, K. Fan and J. Yu, *ACS Catal.*, 2017, **7**, 6179-6187.
- [5] C. -L. Wu, P. -C. Huang, S. Brahma, J. -L. Huang and S. -C. Wang, *Ceram. Int.*, 2017, **43**, S621-S627.
- [6] X. Zhou, Y. Liu, H. Ju, B. Pan, J. Zhu, T. Ding, C. Wang and Q. Yang, *Chem Mater.*, 2016, **28**, 1838-1846.
- [7] L. Yang, W. Zhou, D. Hou, K. Zhou, G. Li, Z. Tang, L. Lia, and S. Chen, *Nanoscale*, 2015, **7**, 5203.
- [8] S. Hao, L. Chen and C. Yu, *ACS Energy Lett.*, 2019, **4**, 952-959.
- [9] J. Sun, Z. Huang, T. Huang, X. Wang, P. Wang, Y. Zong, F. Dai and D. Sun, *ACS Appl. Energy Mater.*, 2019, **2**, 7504-7511.
- [10] W. Li, B. Yu, Y. Hu, X. Wang, D. Yang and Y. Chen, *ACS Sustainable Chem Eng.*, 2019, **7**, 4351-4359.
- [11] X. Wu, D. He, H. Zhang, H. Li, Z. Li, B. Yang, Z. Lin, L. Lei and X. Zhang, *Int. J. Hydrog. Energy.*, 2016, **41**, 10688-94.
- [12] D. Song, H. Wang, X. Wang, B. Yu and Y. Chen, *Electrochim. Acta.*, 2017, **254**, 230-237.
- [13] W. Zhang, Z. Xie, X. Wu, M. Sun, X. Deng, C. Liu, Z. Liu and Q. Huang, *Mater. Lett.*, 2018, **230**, 232-235.
- [14] G. Zhao, P. Li, K. Rui, Y. Chen, S. Dou and W. Sun, *Chem. Eur. J.*, 2018, **24**, 11158-11165.
- [15] J. Yang, D. Voiry, S. Ahn, J. Kang, A. Y. Kim, M. Chhowalla and H. S. Shin, *Angew. Chem. Int. Ed. Engl.*, 2013, **52**, 13751.
- [16] Z. Liu, L. Zhao, Y. Liu, Z. Gao, S. Yuan, X. Li, N. Li and S. Miao, *Appl. Catal. B*, 2019, **246**, 296-302.
- [17] Y. Yang, M. Luo, Y. Xing, S. Wang, W. Zhang, F. Lv, Y. Li, Y. Zhang, W. Wang and S. Guo, *Adv. Mater.*, 2018, **30**, 1706085.

- [18] T. Meng, J. Qin, S. Wang, D. Zhao, B. Mao and M. Cao, *J. Mater. Chem. A*, 2017, **5**, 7001.
- [19] J. -S. Li, B. Du, Z. -H. Lu, Q. -T. Meng and J. -Q. Sha, *New J. Chem.*, 2017, **41**, 10966.
- [20] A. Tahira, Z. H. Ibupoto, M. Willander and O. Nur, *Int. J. Hydrog. Energy.*, 2019, **44**, 26148-26157.
- [21] T. Tian, L. Huang, L. Ai and J. Jiang, *J. Mater. Chem. A*, 2017, **5**, 20985.
